# Supplementary material for: Genome-Wide Identification, Phylogenetic and Expression Analysis of Expansin Gene Family in Medicago sativa L
Source: MDPI journal article supplement (doi:10.3390/ijms25094700), 2024-04-25
Supplement: s1 [file s1]

# Genome-Wide Identification, Phylogenetic and Expression Analysis of Expansin Gene Family in *Medicago sativa* L.

Yajing Li <sup>1,†</sup>, Yangyang Zhang <sup>1,2,†</sup>, Jing Cui <sup>1</sup>, Xue Wang <sup>1</sup>, Mingna Li <sup>1</sup>, Lili Zhang <sup>1</sup>, Zhen Wang <sup>3</sup> and Junmei Kang <sup>1,\*</sup>

<sup>1</sup> Institute of Animal Science, Chinese Academy of Agricultural Sciences, Beijing 100193, China;

[ly\\_yajing@yeah.net](mailto:ly_yajing@yeah.net) (Y.L.); [yang20170115@163.com](mailto:yang20170115@163.com) (Y.Z.); [cuijing0417@yeah.net](mailto:cuijing0417@yeah.net) (J.C.); [wangxue01@caas.cn](mailto:wangxue01@caas.cn) (X.W.); [limingna@caas.cn](mailto:limingna@caas.cn) (M.L.); [lili\\_chang721@yeah.net](mailto:lili_chang721@yeah.net) (L.Z.);

<sup>2</sup> College of Grassland Agriculture, Northwest A&F University, Yangling, 712100, Shaanxi, China;

<sup>3</sup> Department of Agronomy and Horticulture, University of Nebraska-Lincoln, Lincoln, NE 68583, USA;

[zwunl3@gmail.com](mailto:zwunl3@gmail.com) (Z.W.);

\* Correspondence: [kangjunmei@caas.cn](mailto:kangjunmei@caas.cn) (J.K.);

<sup>†</sup> These authors contributed equally to this work.

|           |                                                                                             |     |
|-----------|---------------------------------------------------------------------------------------------|-----|
| MsEXPA113 | .....MNMVTKELRVESAVWQQAHAATFYGGSDASGTMGGACGYGNLYTDGYGIKSAALSTALFNDGKSCGGCYQIVCDARQVP        | 78  |
| MsEXPA114 | .....MVEVMPQEQ.....WIVCDARQVP                                                               | 19  |
| MsEXPA118 | MEKFIICVLLLLMNMVTKELRVESAVWQQAHAATFYGGSDASGTMGGACGYGNLYTDGYGIKSAALSTALFNDGKSCGGCYQIVCDARQVP | 90  |
| MsEXPA119 | MEKIIICVLILLINLLTKELRVESVWQQAHAATFYGGSDASGTMGGACGYGNLYTDGYGIKSAALSTALFNDGKSCGGCYQIVCDARQVP  | 90  |
| MsEXPA120 | MEKFIICVLLLLMNMVTKELRVESAVWQQAHAATFYGGSDASGTMGGACGYGNLYTDGYGIKSAALSTALFNDGKSCGGCYQIVCDARQVP | 90  |
| MsEXPA121 | MEKIIICVLILLINLLTKELRVESVWQQAHAATFYGGSDASGTMGGACGYGNLYTDGYGIKSAALSTALFNDGKSCGGCYQIVCDARQVP  | 90  |
| MsEXPA122 | .....MNMVTKELRVESAVWQQAHAATFYGGSDASGTMGGACGYGNLYTDGYGIKSAALSTALFNDGKSCGGCYQIVCDARQVP        | 78  |
| MsEXPA123 | MEKIIICVLILLINLLTKELRVESVWQQAHAATFYGGSDASGTMGGACGYGNLYTDGYGIKSAALSTALFNDGKSCGGCYQIVCDARQVP  | 90  |
| Consensus | ivcdarqvp                                                                                   |     |
| MsEXPA113 | QWCLRGTSITITATNFCPPNFALPNDNGGWCNPPRPHFDMSPAFQTIKYRAGIVPILYRRVGCKRSGNIRFTINGRDYFELVLISNVG    | 168 |
| MsEXPA114 | QWCLRGTSITITATNFCPPNFALPNDNGGWCNPPRPHFDMSPAFQTIKYRAGIVPILYRRVGCKRSGNIRFTINGRDYFELVLISNVG    | 109 |
| MsEXPA118 | QWCLRGTSITITATNFCPPNFALPNDNGGWCNPPRPHFDMSPAFQTIKYRAGIVPILYRRVGCKRSGNIRFTINGRDYFELVLISNVG    | 180 |
| MsEXPA119 | QWCLRGTSITITATNFCPPNFALPNDNGGWCNPPRPHFDMSPAFQTIKYRAGIVPILYRRVGCKRSGNIRFTINGRDYFELVLISNVG    | 180 |
| MsEXPA120 | QWCLRGTSITITATNFCPPNFALPNDNGGWCNPPRPHFDMSPAFQTIKYRAGIVPILYRRVGCKRSGNIRFTINGRDYFELVLISNVG    | 180 |
| MsEXPA121 | QWCLRGTSITITATNFCPPNFALPNDNGGWCNPPRPHFDMSPAFQTIKYRAGIVPILYRRVGCKRSGNIRFTINGRDYFELVLISNVG    | 180 |
| MsEXPA122 | QWCLRGTSITITATNFCPPNFALPNDNGGWCNPPRPHFDMSPAFQTIKYRAGIVPILYRRVGCKRSGNIRFTINGRDYFELVLISNVG    | 168 |
| MsEXPA123 | QWCLRGTSITITATNFCPPNFALPNDNGGWCNPPRPHFDMSPAFQTIKYRAGIVPILYRRVGCKRSGNIRFTINGRDYFELVLISNVG    | 180 |
| Consensus | qwclrgtsititatanfcppnfalpndnggwcnprrphfdmsqfafqtiakyragivpilyrrvgckrsgnirftingrdyfelvlisnvg |     |
| MsEXPA113 | GGGEISKVWIKGSKKNKWEPMMSMNWGANWQSLSYLNGQSLSFRIQLKNGKTRTAINVAPSNWRFQGSYKSNVQ                  | 241 |
| MsEXPA114 | GGGEISKVWIKGSKKNKWEPMMSMNWGANWQSLSYLNGQSLSFRIQLKNGKTRTAINVAPSNWRFQGSYKSNVQ                  | 182 |
| MsEXPA118 | GGGEISKVWIKGSKKNKWEPMMSMNWGANWQSLSYLNGQSLSFRIQLKNGKTRTAINVAPSNWRFQGSYKSNVQ                  | 253 |
| MsEXPA119 | GGGEISKVWIKGSKKNKWEPMMSMNWGANWQSLSYLNGQSLSFRIQLKNGKTRTAINVAPSNWRFQGSYKSNVQ                  | 253 |
| MsEXPA120 | GGGEISKVWIKGSKKNKWEPMMSMNWGANWQSLSYLNGQSLSFRIQLKNGKTRTAINVAPSNWRFQGSYKSNVQ                  | 253 |
| MsEXPA121 | GGGEISKVWIKGSKKNKWEPMMSMNWGANWQSLSYLNGQSLSFRIQLKNGKTRTAINVAPSNWRFQGSYKSNVQ                  | 253 |
| MsEXPA122 | GGGEISKVWIKGSKKNKWEPMMSMNWGANWQSLSYLNGQSLSFRIQLKNGKTRTAINVAPSNWRFQGSYKSNVQ                  | 241 |
| MsEXPA123 | GGGEISKVWIKGSKKNKWEPMMSMNWGANWQSLSYLNGQSLSFRIQLKNGKTRTAINVAPSNWRFQGSYKSNVQ                  | 253 |
| Consensus | gggeiskvwikgskknkwepmmsmnwganwqslsylingqslsfriqlkngkt tainvapsnwrfqgsyksnvq                 |     |

Figure S1. Homology comparison among eight tandem duplication genes on the scaffold.
